# Supplementary material for: Passive smoking and the risk of hypertension in nonsmoking adults: a systematic review and meta-analysis
Source: PeerJ. 2026 Jan 14;14:e20639. doi: 10.7717/peerj.20639 (PMC12811966; doi:10.7717/peerj.20639)
Supplement: Supplemental Information 3 [file peerj-14-20639-s003.xlsx]

## Sheet: Outcome-nonsmoking adults
	Study	Studytype	Population	Origin	OR	95%CI LL	95%CI UL
26	Ciruzzi et al 1998	Cross-sectional/Case-control study	Non-smoking adults	America	3.28	2.02	5.34
19	Li et al 2015	Cross-sectional/Case-control study	Non-smoking women	Asia	1.99	1.16	3.39
20	Wu et al 2017	Cross-sectional/Case-control study	Non-smoking women	Asia	1.38	1.03	1.85
29	Yang et al 2017 (Husband smoking-only)	Cross-sectional/Case-control study	Non-smoking women	Asia	1.28	1.27	1.3
25	Tamura et al 2018	Cross-sectional/Case-control study	Non-smoking adults	Asia	1.11	1.03	1.2	including men and women
28	Park et al 2018 (Women, ≥2 hour/day)	Cross-sectional/Case-control study	Non-smoking adults	Asia	1.5	1.1	2.04
28	Park et al 2018 (Men, ≥2 hour/day)	Cross-sectional/Case-control study	Non-smoking adults	Asia	0.93	0.52	1.68	including men and women
16	Kim et al 2019	Cohort study	Non-smoking adults	Asia	1.16	1.08	1.24	including men and women
15	Akpa et al 2021	Cross-sectional/Case-control study	Non-smoking adults	America	1.038	1.037	1.04	including men and women
11	Wang et al 2021	Cross-sectional/Case-control study	Non-smoking women	Asia	0.96	0.76	1.2
4	Kim et al 2021 (New SHS)	Cohort study	Non-smoking adults	Asia	1.29	1.06	1.57
4	Kim et al 2021 (Sustained SHS)	Cohort study	Non-smoking adults	Asia	1.18	1.01	1.38
3	Shen et al 2021	Cross-sectional/Case-control study	Non-smoking women	Asia	1.12	0.88	1.44
2	Jalali et al 2022	Cross-sectional/Case-control study	Non-smoking women	Asia	1.05	0.73	1.51
40	Cao et al 2024	Cross-sectional/Case-control study	Non-smoking adults	Asia	1.09	1.03	1.16

## Sheet: Outcome-case control studies
	Study	Studytype	Population	Origin	OR	95%CI LL	95%CI UL
26	Ciruzzi et al 1998	Cross-sectional/Case-control study	Non-smoking adults	America	3.28	2.02	5.34
19	Li et al 2015	Cross-sectional/Case-control study	Non-smoking women	Asia	1.99	1.16	3.39
20	Wu et al 2017	Cross-sectional/Case-control study	Non-smoking women	Asia	1.38	1.03	1.85
29	Yang et al 2017 (Husband smoking-only)	Cross-sectional/Case-control study	Non-smoking women	Asia	1.28	1.27	1.3
25	Tamura et al 2018	Cross-sectional/Case-control study	Non-smoking adults	Asia	1.11	1.03	1.2	including men and women
28	Park et al 2018 (Women, ≥2 hour/day)	Cross-sectional/Case-control study	Non-smoking adults	Asia	1.5	1.1	2.04
28	Park et al 2018 (Men, ≥2 hour/day)	Cross-sectional/Case-control study	Non-smoking adults	Asia	0.93	0.52	1.68	including men and women
15	Akpa et al 2021	Cross-sectional/Case-control study	Non-smoking adults	America	1.038	1.037	1.04	including men and women
11	Wang et al 2021	Cross-sectional/Case-control study	Non-smoking women	Asia	0.96	0.76	1.2
3	Shen et al 2021	Cross-sectional/Case-control study	Non-smoking women	Asia	1.12	0.88	1.44
2	Jalali et al 2022	Cross-sectional/Case-control study	Non-smoking women	Asia	1.05	0.73	1.51
40	Cao et al 2024	Cross-sectional/Case-control study	Non-smoking adults	Asia	1.09	1.03	1.16

## Sheet: Casecontrol-stable results
	Study	Studytype	Population	Origin	OR	95%CI LL	95%CI UL
26	Ciruzzi et al 1998	Cross-sectional/Case-control study	Non-smoking adults	America	3.28	2.02	5.34
19	Li et al 2015	Cross-sectional/Case-control study	Non-smoking women	Asia	1.99	1.16	3.39
20	Wu et al 2017	Cross-sectional/Case-control study	Non-smoking women	Asia	1.38	1.03	1.85
25	Tamura et al 2018	Cross-sectional/Case-control study	Non-smoking adults	Asia	1.11	1.03	1.2	including men and women
28	Park et al 2018 (Women, ≥2 hour/day)	Cross-sectional/Case-control study	Non-smoking adults	Asia	1.5	1.1	2.04
28	Park et al 2018 (Men, ≥2 hour/day)	Cross-sectional/Case-control study	Non-smoking adults	Asia	0.93	0.52	1.68	including men and women
11	Wang et al 2021	Cross-sectional/Case-control study	Non-smoking women	Asia	0.96	0.76	1.2
3	Shen et al 2021	Cross-sectional/Case-control study	Non-smoking women	Asia	1.12	0.88	1.44
2	Jalali et al 2022	Cross-sectional/Case-control study	Non-smoking women	Asia	1.05	0.73	1.51

## Sheet: Subgroup-definition
	Study	Definition	Population	Origin	OR	95%CI LL	95%CI UL
26	Ciruzzi et al 1998	Structured questionnaire	Non-smoking adults	America	3.28	2.02	5.34
19	Li et al 2015	Physical examination or self-reported diagnosis	Non-smoking women	Asia	1.99	1.16	3.39
20	Wu et al 2017	Physical examination or self-reported diagnosis	Non-smoking women	Asia	1.38	1.03	1.85
25	Tamura et al 2018	Physical examination or self-reported diagnosis	Non-smoking adults	Asia	1.11	1.03	1.2	including men and women
28	Park et al 2018 (Women, ≥2 hour/day)	Physical examination or self-reported diagnosis	Non-smoking adults	Asia	1.5	1.1	2.04
28	Park et al 2018 (Men, ≥2 hour/day)	Physical examination or self-reported diagnosis	Non-smoking adults	Asia	0.93	0.52	1.68	including men and women
16	Kim et al 2019	Physical examination or self-reported diagnosis	Non-smoking adults	Asia	1.16	1.08	1.24	including men and women
11	Wang et al 2021	Structured questionnaire	Non-smoking women	Asia	0.96	0.76	1.2
4	Kim et al 2021 (New SHS)	Physical examination or self-reported diagnosis	Non-smoking adults	Asia	1.29	1.06	1.57
4	Kim et al 2021 (Sustained SHS)	Physical examination or self-reported diagnosis	Non-smoking adults	Asia	1.18	1.01	1.38
3	Shen et al 2021	Physical examination or self-reported diagnosis	Non-smoking women	Asia	1.12	0.88	1.44
2	Jalali et al 2022	Physical examination or self-reported diagnosis	Non-smoking women	Asia	1.05	0.73	1.51
40	Cao et al 2024	Physical examination or self-reported diagnosis	Non-smoking adults	Asia	1.09	1.03	1.16

## Sheet: Subgroup-sex
	Study	Gender	OR	95%CI LL	95%CI UL
19	Li et al 2015	Female	1.99	1.16	3.39
20	Wu et al 2017	Female	1.38	1.03	1.85
25	Tamura et al 2018	Female	1.09	0.99	1.18
28	Park et al 2018	Female	1.5	1.1	2.04
16	Kim et al 2019	Female	1.15	1.02	1.3
11	Wang et al 2021	Female	0.96	0.76	1.2
3	Shen et al 2021	Female	1.12	0.88	1.44
2	Jalali et al 2022	Female	1.05	0.73	1.51
25	Tamura et al 2018	Male	1.21	1	1.46
28	Park et al 2018	Male	0.93	0.52	1.68
16	Kim et al 2019	Male	1.14	1.05	1.24

## Sheet: Subgroup-women
	Study	Studytype	Sex	Origin	OR	95%CI LL	95%CI UL
19	Li et al 2015	Cross-sectional study	Non-smoking women	Asia	1.99	1.16	3.39
20	Wu et al 2017	Cross-sectional study	Non-smoking women	Asia	1.38	1.03	1.85
29	Yang et al 2017 (Husband smoking-only)	Cross-sectional study	Non-smoking women	Asia	1.28	1.27	1.3
25	Tamura et al 2018	Cross-sectional study	Non-smoking women	Asia	1.09	0.99	1.18
28	Park et al 2018	Cross-sectional study	Non-smoking women	Asia	1.5	1.1	2.04
16	Kim et al 2019	Cohort study	Non-smoking women	Asia	1.15	1.02	1.3
15	Akpa et al 2021	Cross-sectional study	Non-smoking women	America	1.24	1.238	1.242
11	Wang et al 2021	Cross-sectional study	Non-smoking women	Asia	0.96	0.76	1.2
3	Shen et al 2021	Cross-sectional study	Non-smoking women	Asia	1.12	0.88	1.44
2	Jalali et al 2022	Cross-sectional study	Non-smoking women	Asia	1.05	0.73	1.51

## Sheet: Subgroup-men
	Study	Studytype	Sex	Origin	OR	95%CI LL	95%CI UL
25	Tamura et al 2018	Cross-sectional study	Non-smoking men	Asia	1.21	1	1.46
28	Park et al 2018	Cross-sectional study	Non-smoking men	Asia	0.93	0.52	1.68
16	Kim et al 2019	Cohort study	Non-smoking men	Asia	1.14	1.05	1.24
15	Akpa et al 2021	Cross-sectional study	Non-smoking men	America	0.755	0.754	0.757

## Sheet: Subgroup-frequency of SHS
	Study	Frequency of SHS exposure	OR	95%CI LL	95%CI UL
16	Kim et al 2019	<3 times/week	1.17	1.08	1.27
4	Kim et al 2021 (At baseline)	<3 times/week	0.92	0.82	1.04
4	Kim et al 2021 (At follow-up)	<3 times/week	1.16	0.99	1.35
40	Cao et al 2024	<3 times/week	0.94	0.81	1.09
16	Kim et al 2019	≥ 3 times/week	1.13	1.02	1.25
4	Kim et al 2021 (At baseline)	≥ 3 times/week	1.01	0.87	1.18
4	Kim et al 2021 (At follow-up)	≥ 3 times/week	1.49	1.22	1.83
40	Cao et al 2024 (3–5 times/week)	≥ 3 times/week	1.01	0.87	1.18
40	Cao et al 2024 (Nearly everyday)	≥ 3 times/week	1.14	1.06	1.22

## Sheet: Subgroup-duration of SHS
	Study	Duration of SHS exposure	OR	95%CI LL	95%CI UL
16	Kim et al 2019	<10 years	1.16	1.02	1.31
4	Kim et al 2021 (At baseline)	<10 years	0.98	0.8	1.21
4	Kim et al 2021 (At follow-up)	<10 years	1.31	1.04	1.65
2	Jalali et al 2022	<10 years	0.84	0.52	1.37
16	Kim et al 2019	≥10 years	1.18	1.07	1.3
4	Kim et al 2021 (At baseline)	≥10 years	1.17	1.02	1.33
4	Kim et al 2021 (At follow-up)	≥10 years	1.33	1.13	1.56
2	Jalali et al 2022	≥10 years	1.34	0.81	2.22
